# Supplementary material for: [1,2,3]Triazolo[1,5-a]pyridine derivatives as molecular chemosensors for zinc(ii), nitrite and cyanide anions
Source: Royal Society of Chemistry journal article supplement (doi:10.1039/b906992e), 2009-01-01
Supplement: b906992e.pdf [file b906992e.pdf]

## Supplementary Materials

### Includes:

Structure of the ligands.

**Fig. S1:** UV-Visible spectra of TPS and TPSM(II) in ethanol water 98/2 v/v.

**Fig. S2:** UV-Visible spectra of TPT and TPTM(II) in ethanol water 98/2 v/v.

**Fig. S3:** Normalized fluorescence emission spectra of TPS in ethanol:water (98:2) ( $10^{-5}$  M) upon addition of Zn(II) ( $\lambda_{\text{ex}} = 340$  nm).

**Fig. S4:** Normalized fluorescence emission spectra of TPT in ethanol ( $10^{-5}$  M) upon addition of Zn(II) ( $\lambda_{\text{ex}} = 359$  nm).

**Fig. S5:** Normalized fluorescence emission spectra of TPS in ethanol:water (98:2) ( $10^{-5}$  M) upon addition of Cu(II) ( $\lambda_{\text{ex}} = 340$  nm).

**Fig. S6:** Normalized fluorescence emission spectra of TPT in ethanol:water (98:2) ( $10^{-5}$  M) upon addition of Cu(II) ( $\lambda_{\text{ex}} = 359$  nm).

**Fig. S7:** Normalized fluorescence emission spectra of TPT in ethanol:water (98:2) ( $10^{-5}$  M) upon addition of Cd(II) ( $\lambda_{\text{ex}} = 359$  nm).

**Fig. S8:** Normalized fluorescence emission spectra of ZnTPT<sup>2+</sup> in ethanol:water (98:2, v/v) ( $10^{-5}$  M) upon addition of fluoride in water ( $10^{-3}$  M) ( $\lambda_{\text{ex}} = 359$  nm).

**Fig. S9:** Evolution of the normalized intensity of ZnTPT<sup>2+</sup> with fluoride concentration.

**Fig. S10:** Normalized fluorescence emission spectra of ZnTPT<sup>2+</sup> in ethanol:water (98:2, v/v) ( $10^{-5}$  M) upon addition of chloride in water ( $10^{-3}$  M) ( $\lambda_{\text{ex}} = 359$  nm).

**Fig. S10:** Normalized fluorescence emission spectra of ZnTPT<sup>2+</sup> in ethanol:water (98:2, v/v) ( $10^{-5}$  M) upon addition of chloride in water ( $10^{-3}$  M) ( $\lambda_{\text{ex}} = 359$  nm).

**Fig. S11:** Evolution of the normalized intensity of ZnTPT<sup>2+</sup> with chloride concentration.

**Fig. S12:** Normalized fluorescence emission spectra of ZnTPT<sup>2+</sup> in ethanol:water (98:2, v/v) ( $10^{-5}$  M) upon addition of bromide in water ( $10^{-3}$  M) ( $\lambda_{\text{ex}} = 359$  nm).

**Fig. S13:** Evolution of the normalized intensity of ZnTPT<sup>2+</sup> with bromide concentration.

**Fig. S14:** Normalized fluorescence emission spectra of ZnTPT<sup>2+</sup> in ethanol:water (98:2, v/v) ( $10^{-5}$  M) upon addition of iodide in water ( $10^{-3}$  M) ( $\lambda_{\text{ex}} = 359$  nm).

**Fig. S15:** Evolution of the normalized intensity of ZnTPT<sup>2+</sup> with iodide concentration.

**Fig. S16:** Normalized fluorescence emission spectra of ZnTPT<sup>2+</sup> in ethanol:water (98:2, v/v) ( $10^{-5}$  M) upon addition of cyanide in water ( $10^{-3}$  M) ( $\lambda_{\text{ex}} = 359$  nm).

**Fig. S17:** Evolution of the normalized intensity of ZnTPT<sup>2+</sup> with cyanide concentration.

**Fig. S18:** Normalized fluorescence emission spectra of ZnTPT<sup>2+</sup> in ethanol:water (98:2, v/v) ( $10^{-5}$  M) upon addition of thiocyanate in water ( $10^{-3}$  M) ( $\lambda_{\text{ex}} = 359$  nm).

**Fig. S19:** Evolution of the normalized intensity of ZnTPT<sup>2+</sup> with thiocyanate concentration.

**Fig. S20:** Normalized fluorescence emission spectra of ZnTPT<sup>2+</sup> in ethanol:water (98:2, v/v) ( $10^{-5}$  M) upon addition of nitrite in water ( $10^{-3}$  M) ( $\lambda_{\text{ex}} = 359$  nm).

**Fig. S21:** Evolution of the normalized intensity of ZnTPT<sup>2+</sup> with nitrite concentration.

**Fig. S22:** Normalized fluorescence emission spectra of ZnTPT<sup>2+</sup> in ethanol:water (98:2, v/v) ( $10^{-5}$  M) upon addition of nitrate in water ( $10^{-3}$  M) ( $\lambda_{\text{ex}} = 359$  nm).

**Fig. S23:** Evolution of the normalized intensity of ZnTPT<sup>2+</sup> with nitrate concentration.

**Figs. S24 and S25.** Detection Limits.

**Fig. S26.** Comparison between the fluorescence changes produced by the different anions.

#### **Special Details of the X-ray refinement**

**Fig. S27.** Fraction of the crystal packing along the b-axis. Hydrogen atoms, CH<sub>3</sub>CN molecules and ClO<sub>4</sub><sup>-</sup> counter-anions are not shown

**Fig. S28.** <sup>1</sup>H-NMR comparison between TPT (up) and TPTZnCl<sub>2</sub> (down)

## Structures

(2*R*)-2-(6-([1,2,3]triazolo[1,5-*a*]pyridin-3-yl)pyridin-2-yl)-1,3,3-trimethylbicyclo[2.2.1]heptan-2-ol (2) (TPF)

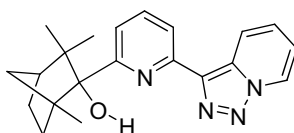

3-(6-(*p*-tolylsulfinyl)pyridin-2-yl)-[1,2,3]triazolo[1,5-*a*]pyridine (4) (TPS)

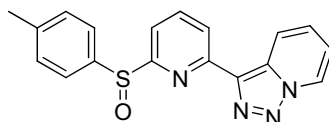

2,6-di([1,2,3]triazolo[1,5-*a*]pyridin-3-yl)pyridine (6) (TPT)

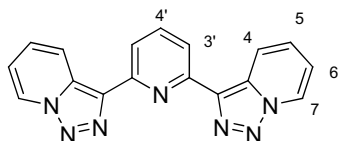

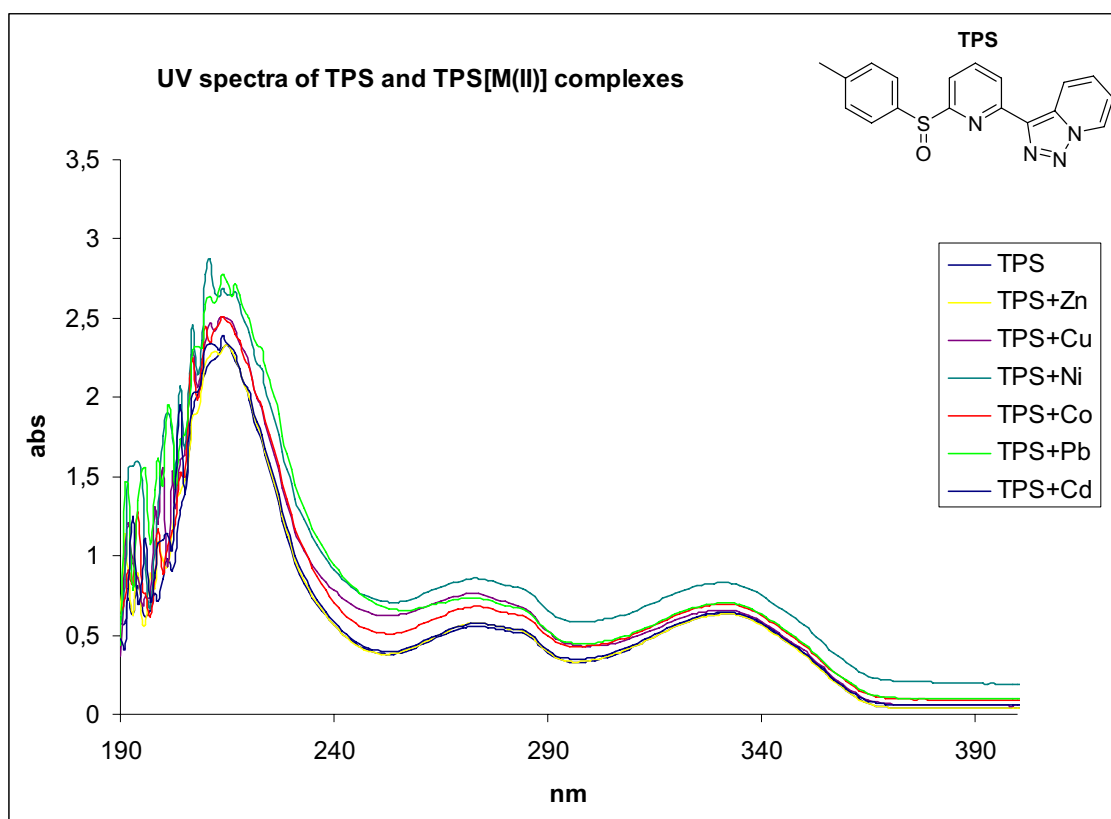

**Fig. S1:** UV-Visible spectra of TPS and TPSM(II) in ethanol:water 98/2 v/v.

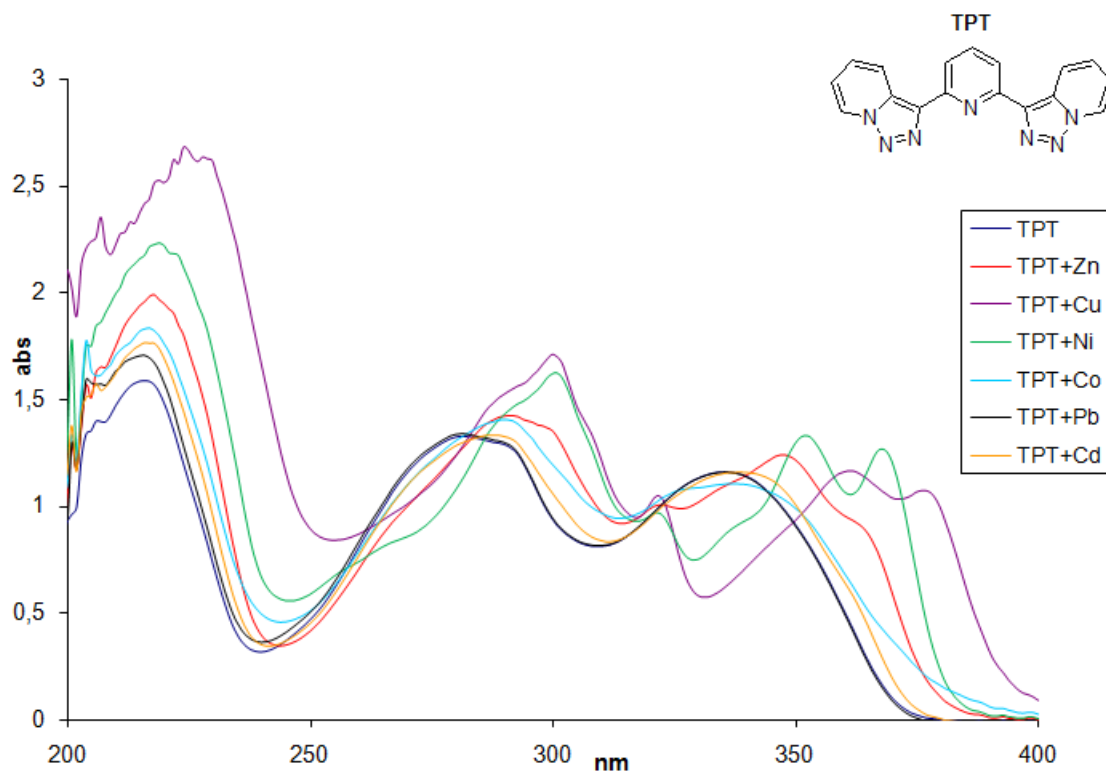

**Fig. S2:** UV-Visible spectra of TPT and TPTM(II) in ethanol:water 98/2 v/v.

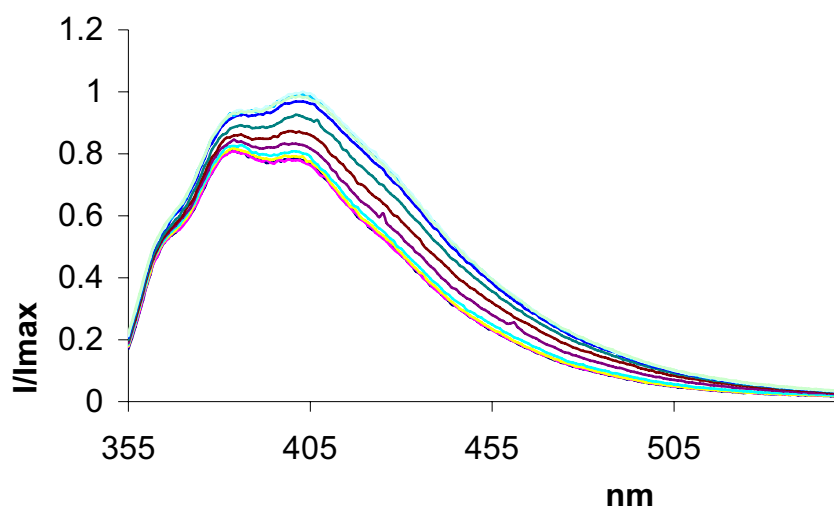

**Fig. S3:** Normalized fluorescence emission spectra of TPS in ethanol:water (98:2) ( $10^{-5}$  M) upon addition of Zn(II) ( $\lambda_{\text{ex}} = 340$  nm).

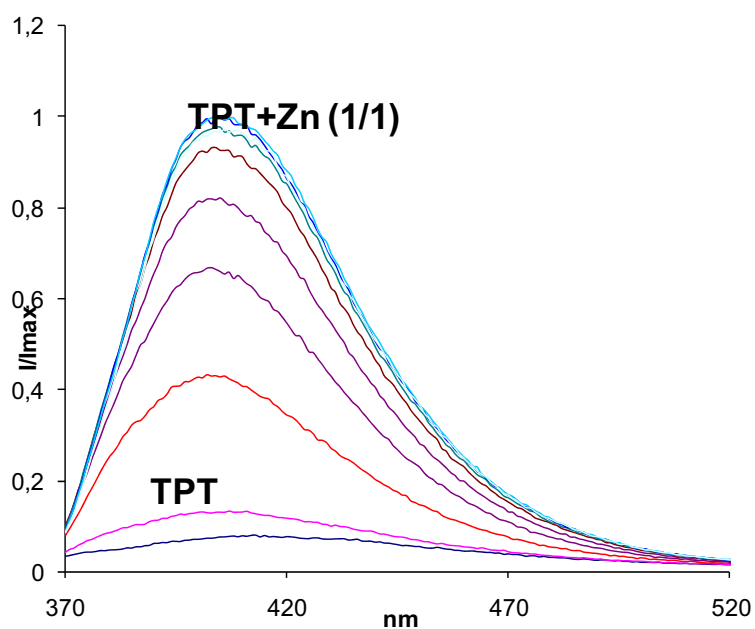

**Fig. S4:** Normalized fluorescence emission spectra of TPT in ethanol ( $10^{-5}$  M) upon addition of Zn(II) ( $\lambda_{\text{ex}} = 359$  nm).

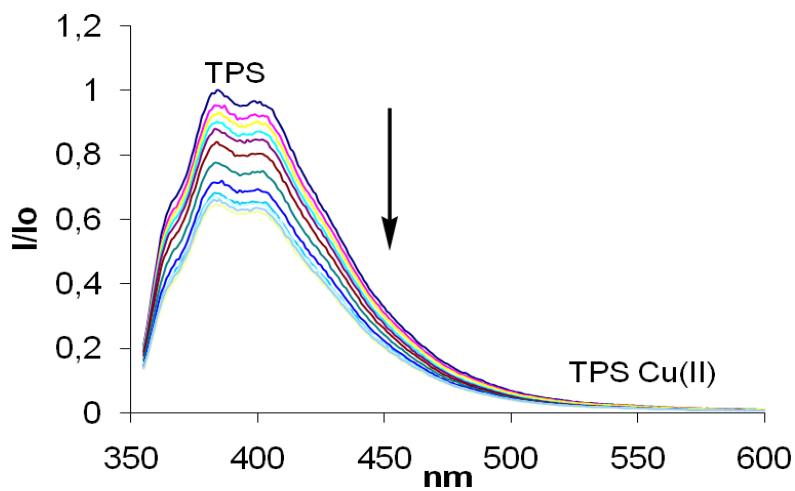

**Fig. S5:** Normalized fluorescence emission spectra of TPS in ethanol:water (98:2) ( $10^{-5}$  M) upon addition of Cu(II) ( $\lambda_{\text{ex}} = 340$  nm).

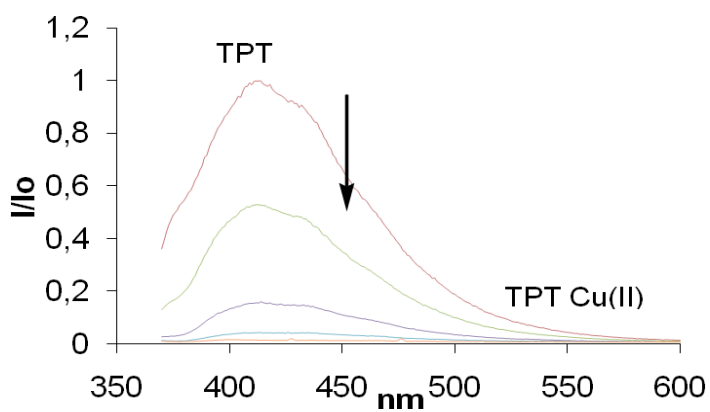

**Fig. S6:** Normalized fluorescence emission spectra of TPT in ethanol:water (98:2) ( $10^{-5}$  M) upon addition of Cu(II) ( $\lambda_{\text{ex}} = 359$  nm).

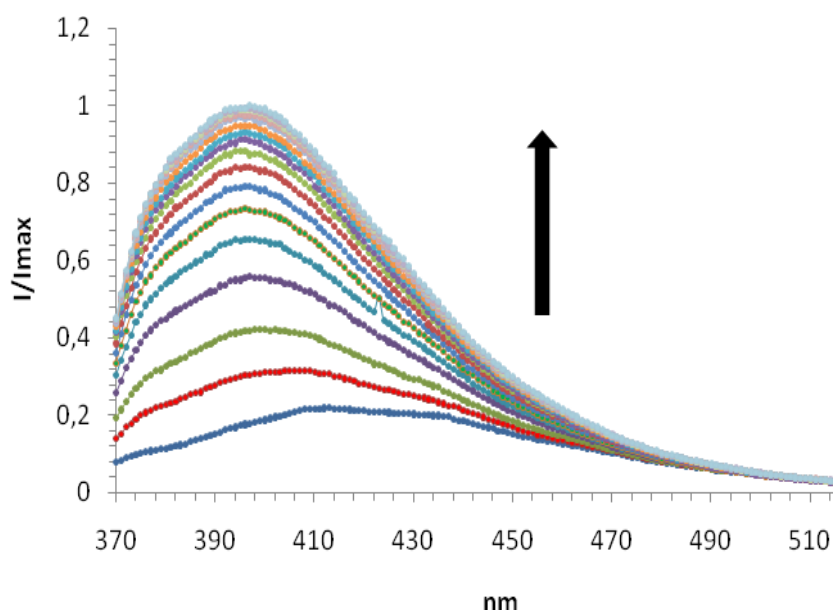

**Fig. S7:** Normalized fluorescence emission spectra of TPT in ethanol:water (98:2) (10<sup>-5</sup> M) upon addition of Cd(II) ( $\lambda_{\text{ex}} = 359$  nm).

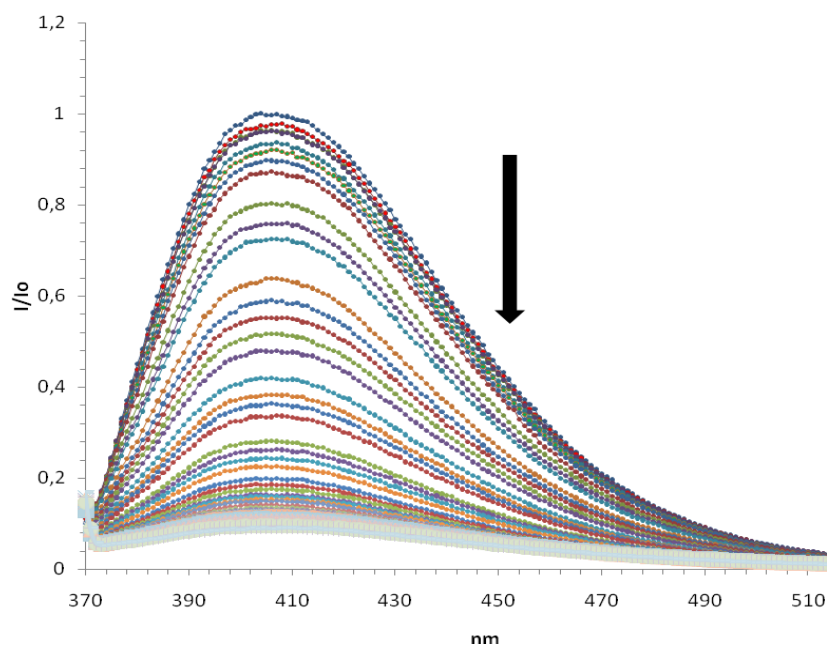

**Fig. S8:** Normalized fluorescence emission spectra of ZnTPT<sup>2+</sup> in ethanol:water (98:2, v/v) (10<sup>-5</sup> M) upon addition of fluoride in water (10<sup>-3</sup> M) ( $\lambda_{\text{ex}} = 359$  nm).

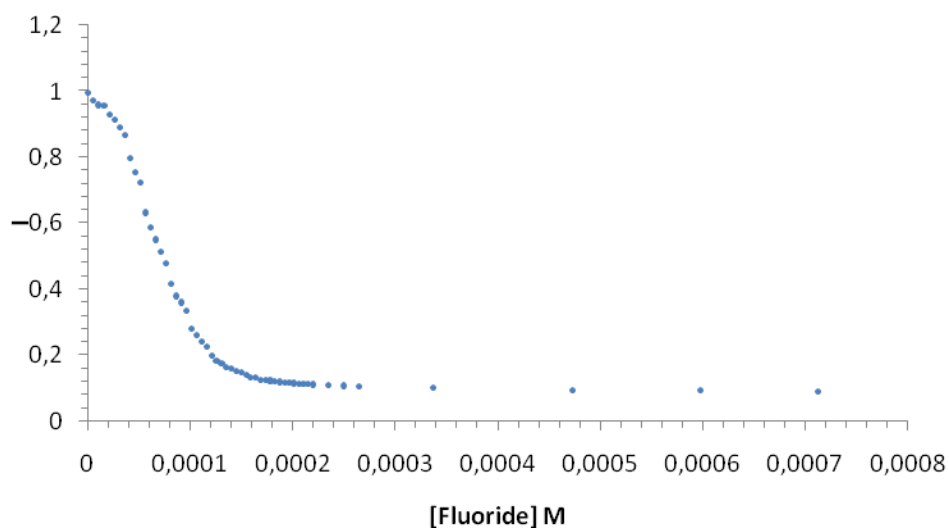

**Fig. S9:** Evolution of the normalized intensity of ZnTPT<sup>2+</sup> with fluoride concentration.



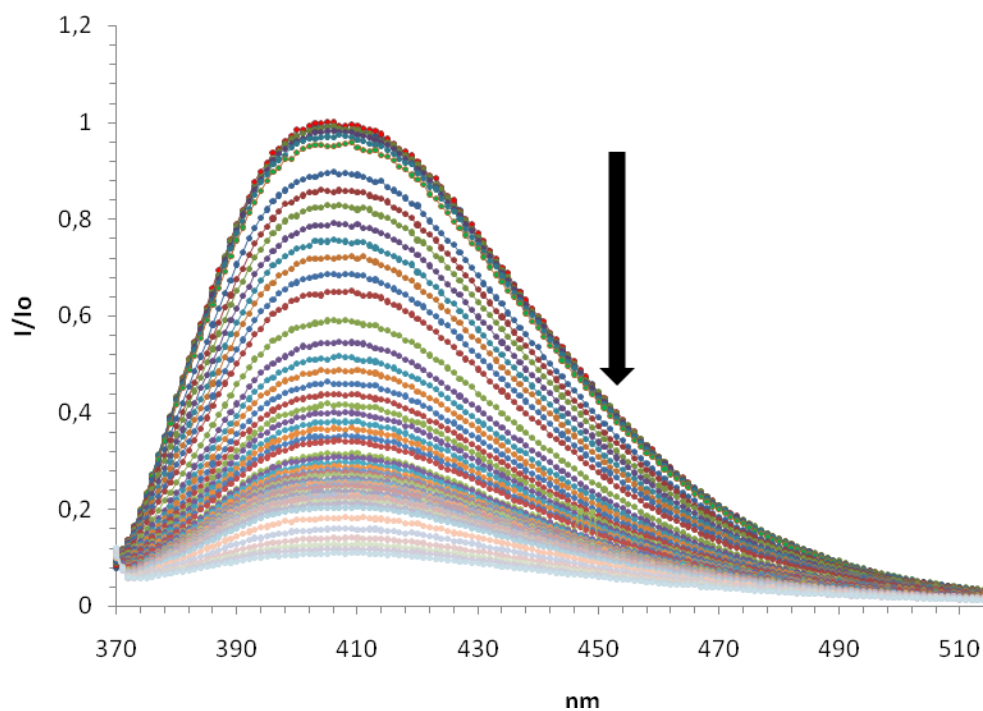

**Fig. S10:** Normalized fluorescence emission spectra of ZnTPT<sup>2+</sup> in ethanol:water (98:2, v/v) ( $10^{-5}$  M) upon addition of chloride in water ( $10^{-3}$  M) ( $\lambda_{\text{ex}} = 359$  nm).

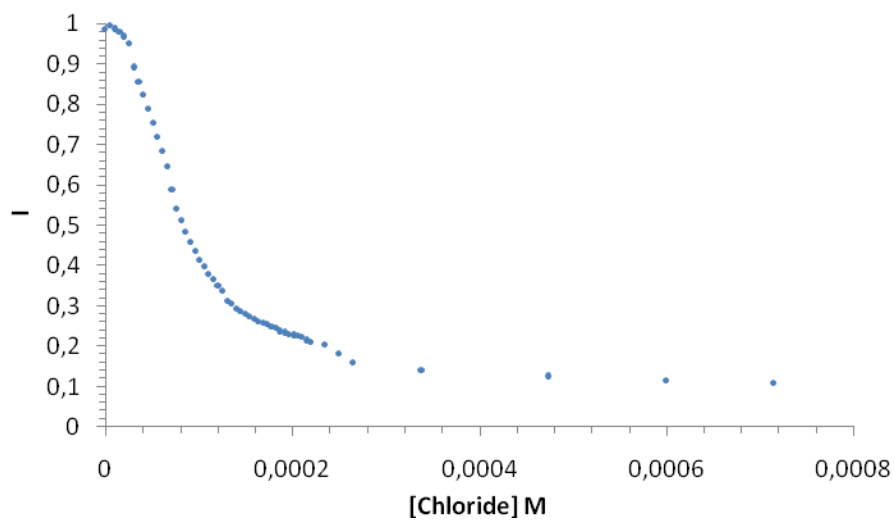

**Fig. S11:** Evolution of the normalized intensity of ZnTPT<sup>2+</sup> with chloride concentration.

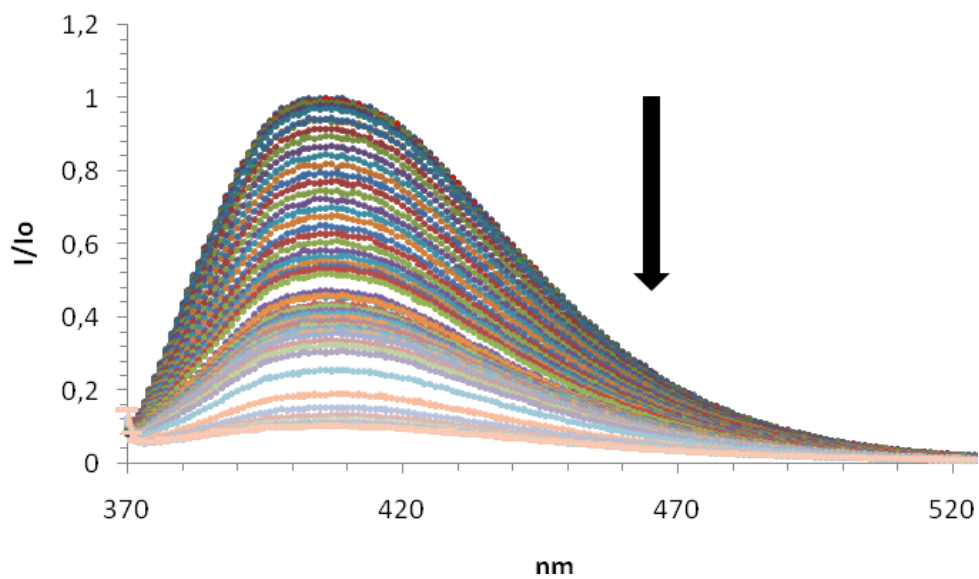

**Fig. S12:** Normalized fluorescence emission spectra of  $\text{ZnTPT}^{2+}$  in ethanol:water (98:2, v/v) ( $10^{-5}$  M) upon addition of bromide in water ( $10^{-3}$  M) ( $\lambda_{\text{ex}} = 359$  nm).

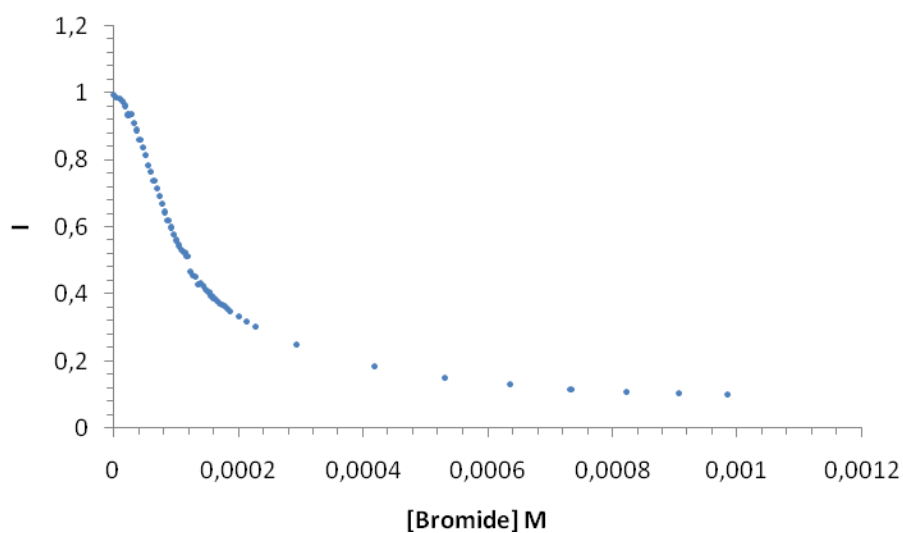

**Fig. S13:** Evolution of the normalized intensity of  $\text{ZnTPT}^{2+}$  with bromide concentration.

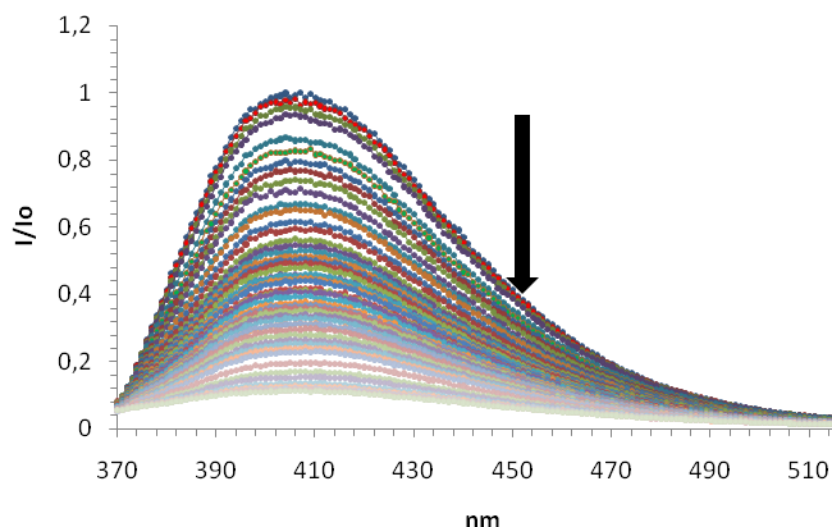

**Fig. S14:** Normalized fluorescence emission spectra of ZnTPT<sup>2+</sup> in ethanol:water (98:2, v/v) ( $10^{-5}$  M) upon addition of iodide in water ( $10^{-3}$  M) ( $\lambda_{\text{ex}} = 359$  nm).

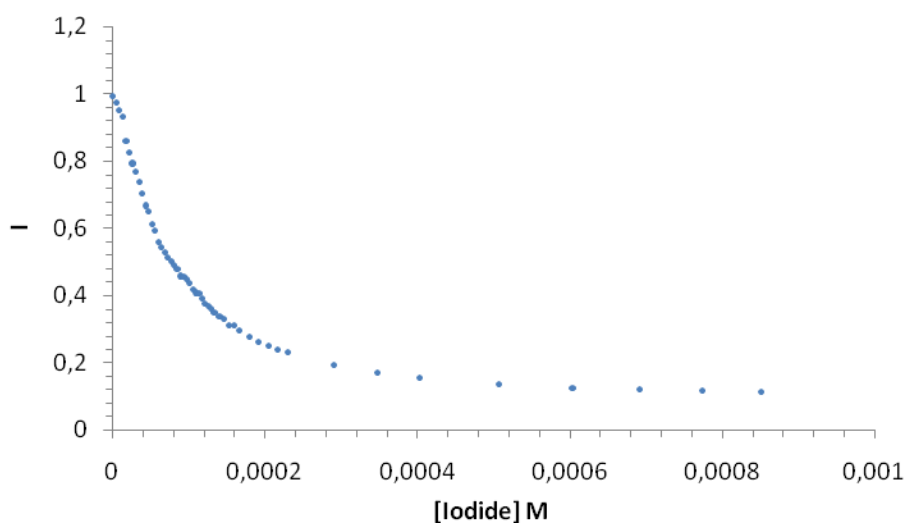

**Fig. S15:** Evolution of the normalized intensity of ZnTPT<sup>2+</sup> with iodide concentration.

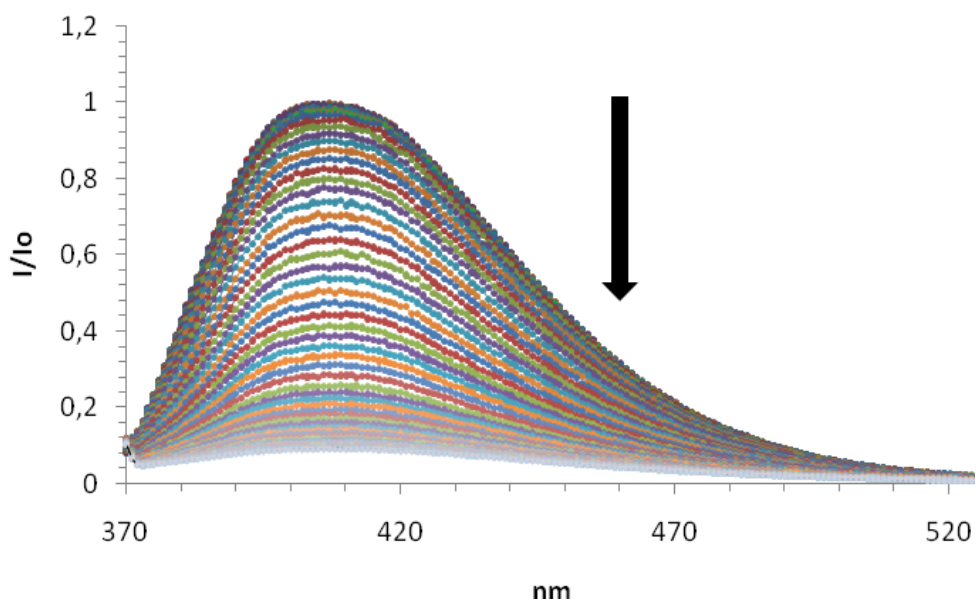

**Fig. S16:** Normalized fluorescence emission spectra of ZnTPT<sup>2+</sup> in ethanol:water (98:2, v/v) ( $10^{-5}$  M) upon addition of cyanide in water ( $10^{-3}$  M) ( $\lambda_{\text{ex}} = 359$  nm).

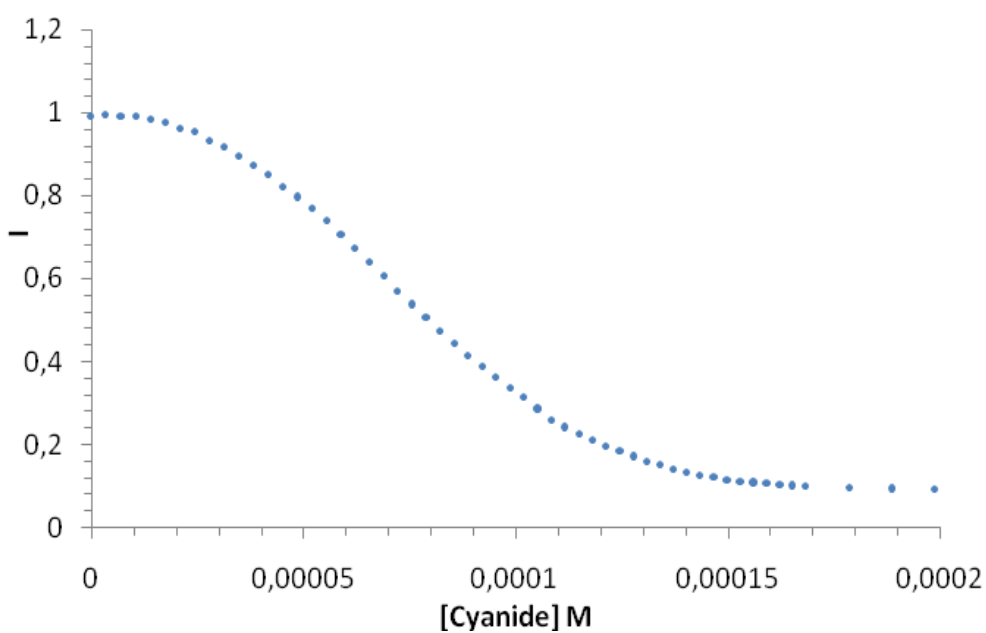

**Fig. S17:** Evolution of the normalized intensity of ZnTPT<sup>2+</sup> with cyanide concentration.

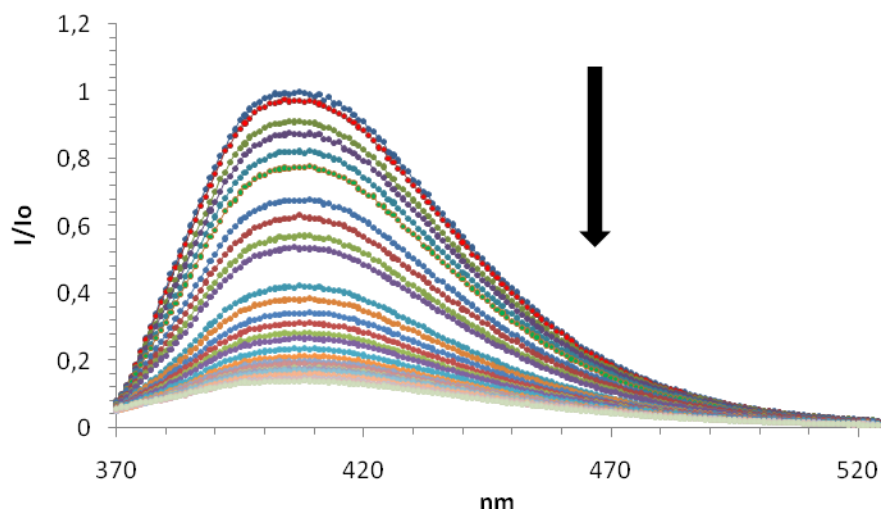

**Fig. S18:** Normalized fluorescence emission spectra of ZnTPT<sup>2+</sup> in ethanol:water (98:2, v/v) (10<sup>-5</sup> M) upon addition of thiocyanate in water (10<sup>-3</sup> M) ( $\lambda_{\text{ex}} = 359$  nm).

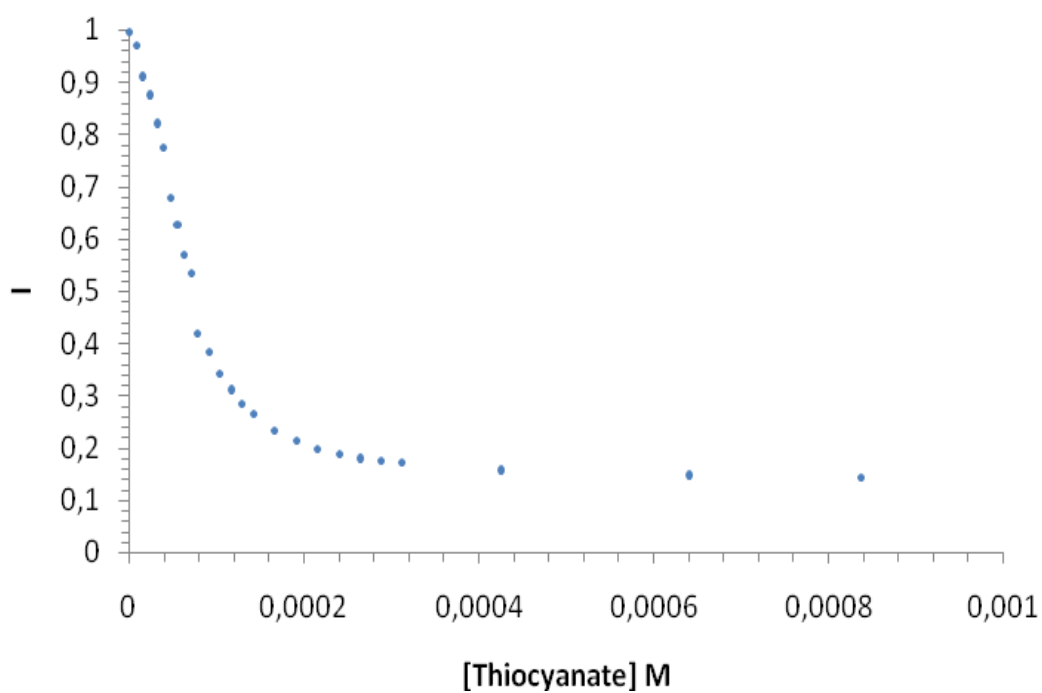

**Fig. S19:** Evolution of the normalized intensity of ZnTPT<sup>2+</sup> with thiocyanate concentration.

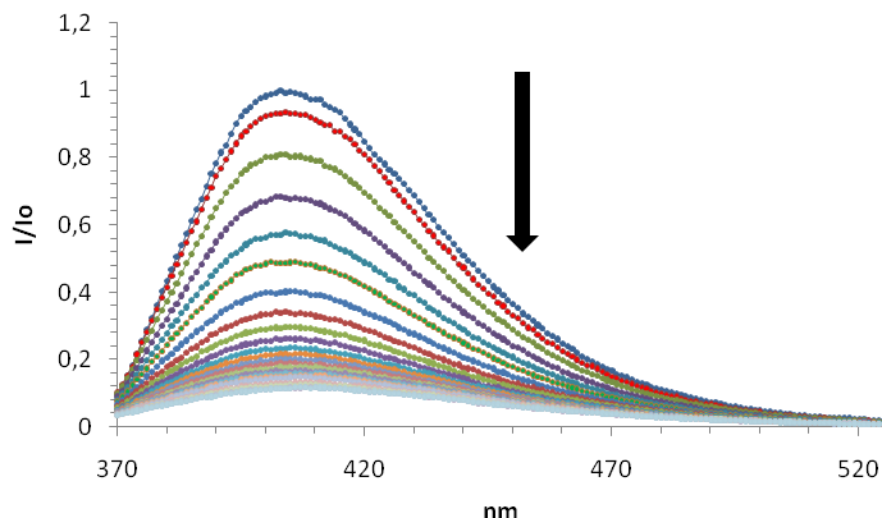

**Fig. S20:** Normalized fluorescence emission spectra of  $\text{ZnTPT}^{2+}$  in ethanol:water (98:2, v/v) ( $10^{-5}$  M) upon addition of nitrite in water ( $10^{-3}$  M) ( $\lambda_{\text{ex}} = 359$  nm).

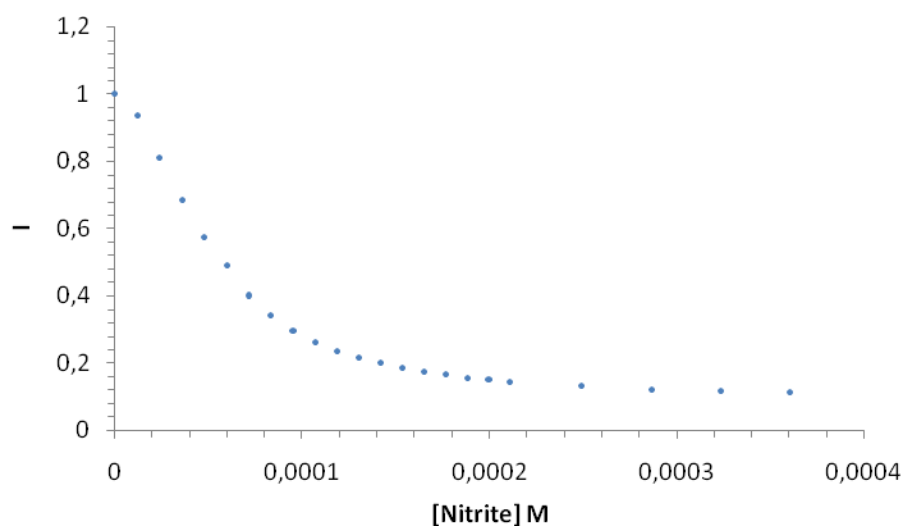

**Fig. S21:** Evolution of the normalized intensity of  $\text{ZnTPT}^{2+}$  with nitrite concentration.

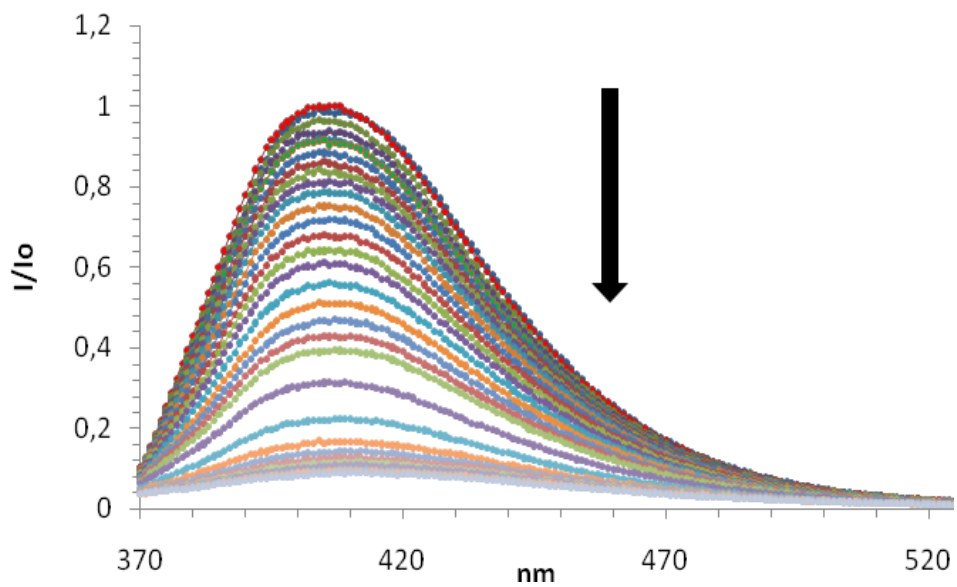

**Fig. S22:** Normalized fluorescence emission spectra of  $\text{ZnTPT}^{2+}$  in ethanol:water (98:2, v/v) ( $10^{-5}$  M) upon addition of nitrate in water ( $10^{-3}$  M) ( $\lambda_{\text{ex}} = 359$  nm).

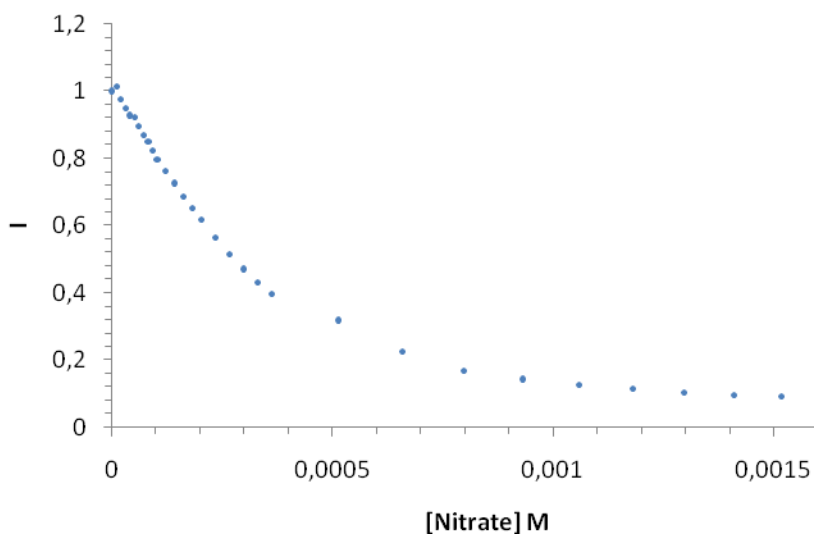

**Fig. S23:** Evolution of the normalized intensity of  $\text{ZnTPT}^{2+}$  with nitrate concentration.

### Detection Limits:

The detection limit depends on the instrumentation (*i.e.* the Signal-to-Noise Ratio gives a quantitative indication of the sensitivity; in this case this value is 133) and on the sensitivity of the ligand defined as the  $\Delta(\text{luminiscence})/\Delta[\text{substrate}]$ . Using these two parameters, the limit of detection (LOD) can then be calculated as  $3 \times \text{SNR}/\text{sensitivity}$ .

### Cyanide:

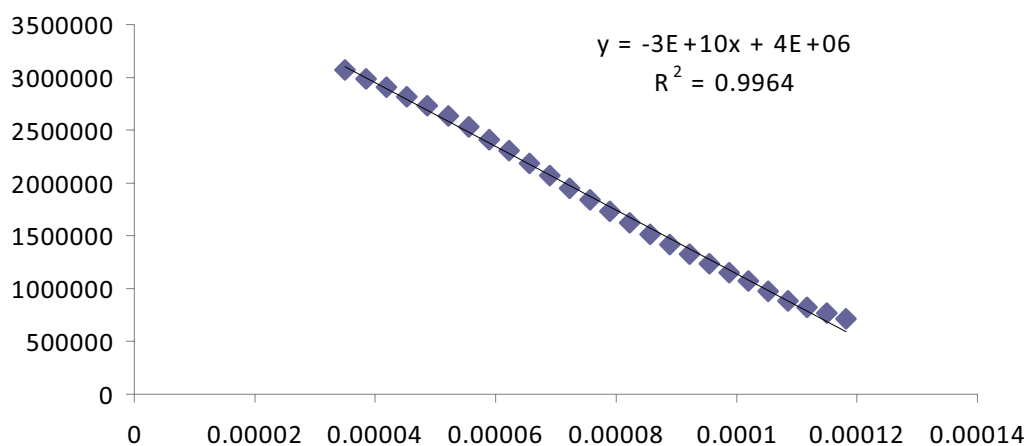

**Fig. S24:** : Evolution of the intensity of ZnTPT<sup>2+</sup> with cyanide concentration.

$$\text{LOD (ppm)} = [3 \times 133 / 3E+10] \times 1000 \times \text{M.W.}^{(\text{KCN})} = 0.00087 \text{ ppm.}$$

### Nitrite

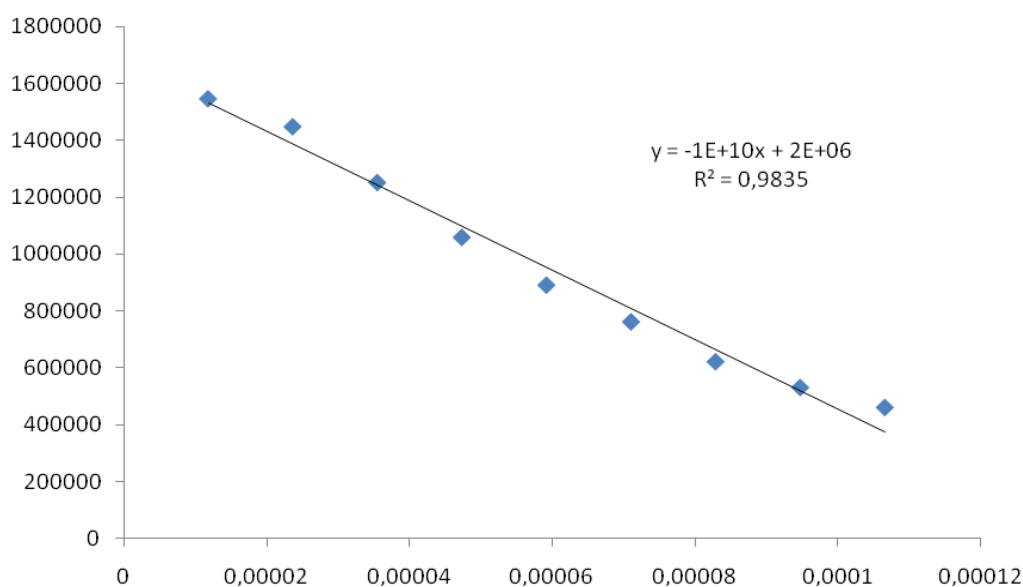

**Fig. S25:** : Evolution of the intensity of ZnTPT<sup>2+</sup> with nitrite concentration.

$$\text{LOD (ppm)} = [3 \times 133 / 1E+10] \times 1000 \times \text{M.W.}^{(\text{NaNO}_2)} = 0.0032 \text{ ppm.}$$



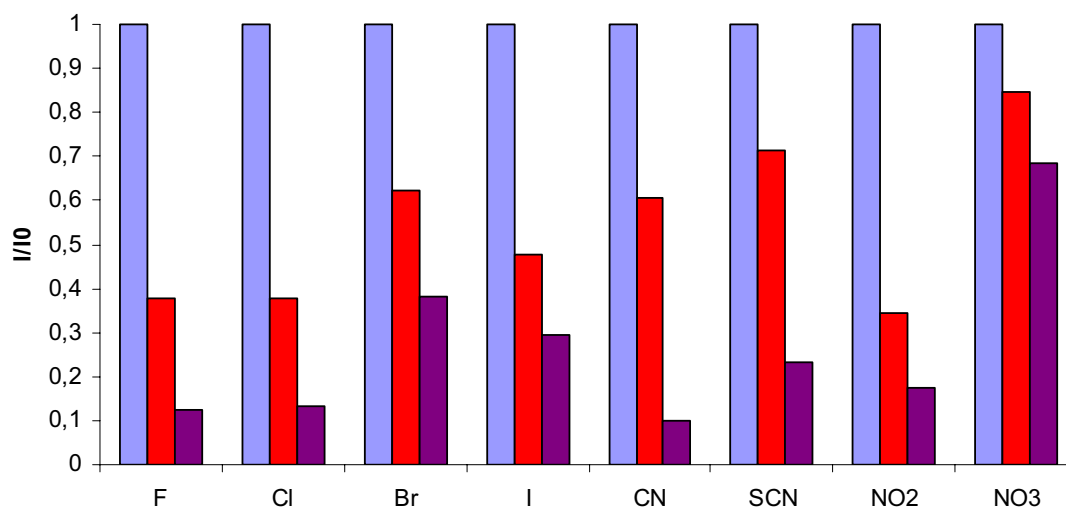

**Fig. S26.** Comparison between different anions TPTZn<sup>2+</sup> (blue), after the addition of 1 eq of anion (red), after the addition of 2 eq. of anion (purple).

### X-ray structure:

The structure was solved and refined in space group Pc (SHELXS-97 and SHELXL-97, G.M. Sheldrick, University of Göttingen, 1997). The structure was refined as an enantiomeric twin with components 0.405(12) and 0.595(12). Three perchlorate anions are disordered over two sites. Residual electron density was tentatively identified as a disordered molecule of CH<sub>3</sub>CN. The disordered atoms were refined isotropically. Residual electron density was tentatively refined as a disordered CH<sub>3</sub>CN molecule. The structure possible higher (pseudo) symmetry (P2(1)/C space group) as suggested by ADDSYM has been closely examined. The true space group is Pc and the extra symmetry is pseudo symmetry but, in the presence of disorder, an unambiguous decision is difficult. Attempts of refinement in space group P2(1)/c afford

```
- Extinction coefficient 0.001196
- R1= 0.1299
- wR2=0.3201
- GooF = S = 1.109
- 11 Systematic absence violations
```

| h  | k  | l | Fo <sup>2</sup> | Sigma (Fo <sup>2</sup> ) |
|----|----|---|-----------------|--------------------------|
| 0  | 9  | 0 | 79.10           | 3.30                     |
| 0  | 13 | 0 | 8.80            | 1.40                     |
| 0  | 13 | 0 | 6.40            | 0.80                     |
| 0  | 15 | 0 | 6.40            | 0.90                     |
| 0  | 15 | 0 | 4.00            | 0.90                     |
| 0  | 17 | 0 | 22.30           | 1.30                     |
| 0  | 17 | 0 | 21.10           | 1.50                     |
| 0  | 23 | 0 | 5.60            | 1.30                     |
| -3 | 0  | 1 | 1.40            | 0.20                     |
| 1  | 0  | 1 | 1.80            | 0.30                     |
| 2  | 0  | 1 | 2.10            | 0.50                     |

Other special features of refinement are as follows. Both disordered perchlorate anions and solvent CH<sub>3</sub>CN molecule were refined with appropriate similarity restraints (command SAME). Disordered atom U value components were restrained to be equal (commands DELU, SIMU, ISOR). Local ring geometry of aromatic groups was also restrained (commands FLAT, SAME).

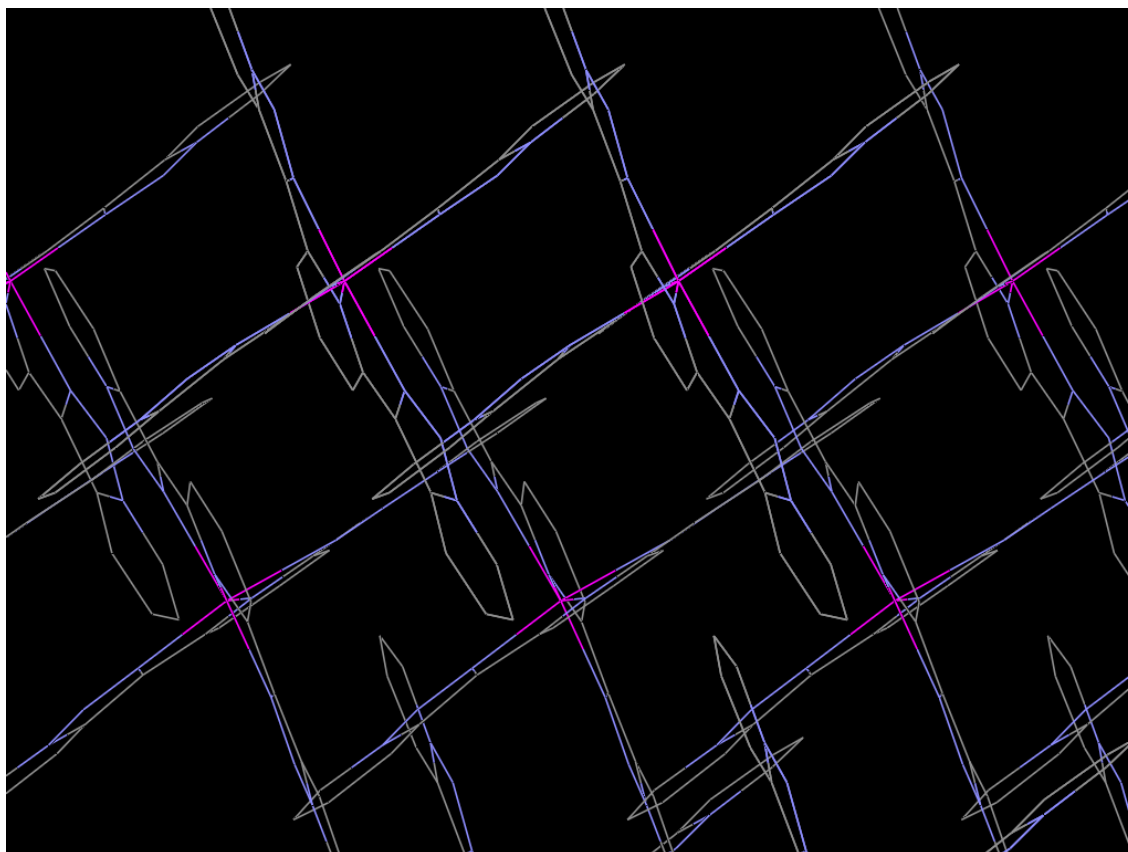

**Fig. S27.** Fraction of the crystal packing along the b-axis. Hydrogen atoms, CH<sub>3</sub>CN molecules and ClO<sub>4</sub><sup>-</sup> counter-anions are not shown.

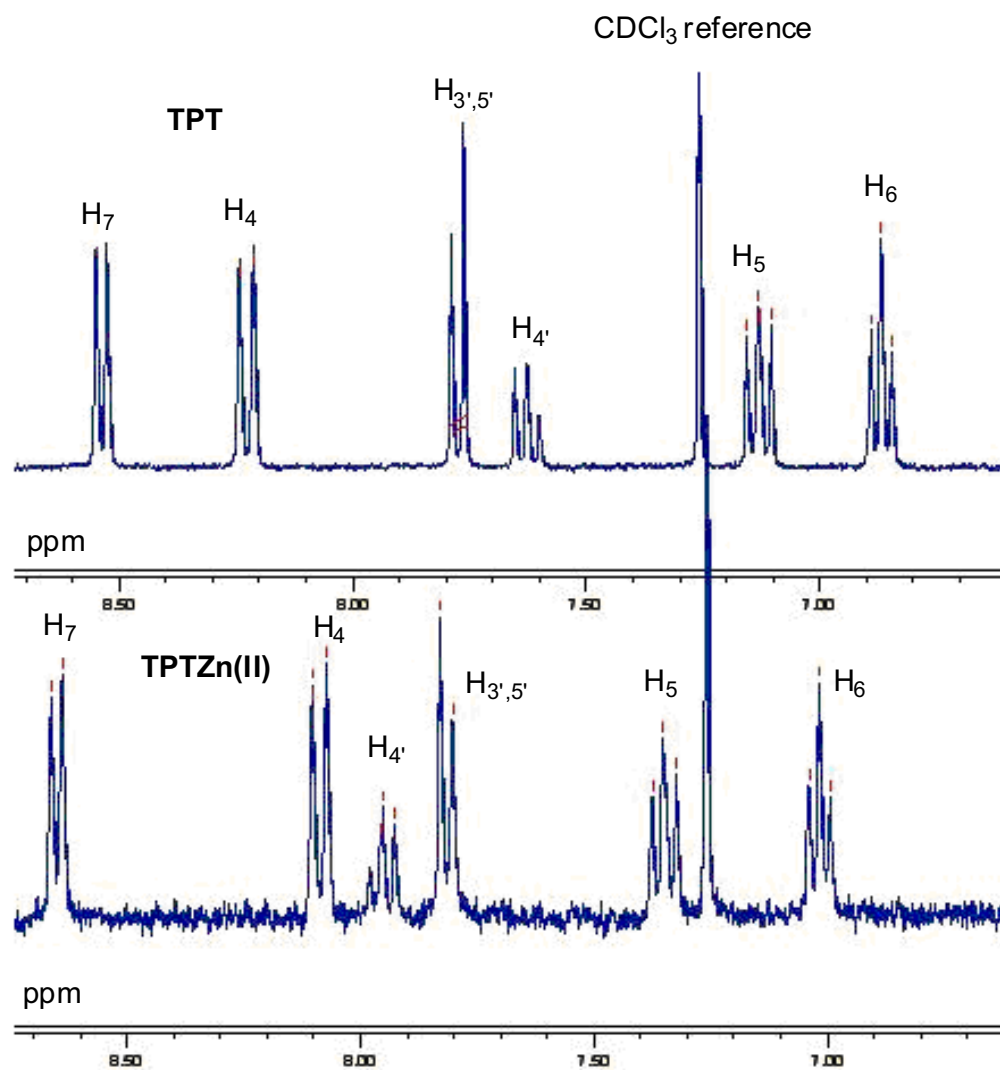

**Fig. S28.** <sup>1</sup>H-NMR comparison between TPT (up) and TPTZnCl<sub>2</sub> (down)
